# Supplementary material for: Long noncoding RNA lnc-RI is a new regulator of mitosis via targeting miRNA-210-3p to release PLK1 mRNA activity
Source: PubMed Central journal article supplement (PMC4861912; doi:10.1038/srep25385), 2016-05-10
Supplement: srep25385-s1.pdf [file srep25385-s1.pdf]

# Long noncoding RNA Inc-RI is a new regulator of mitosis via targeting miRNA-210-3p to release PLK1 mRNA activity

Zhi-Dong Wang<sup>1,\*,#</sup>, Li-Ping Shen<sup>1,#</sup>, Cheng Chang<sup>1,2</sup>, Xue-Qing Zhang<sup>1</sup>, Zhong-Min Chen<sup>1</sup>, Lin Li<sup>1</sup>, Hong Chen<sup>1</sup> and Ping-Kun Zhou<sup>1,2,\*</sup>

<sup>1</sup>Department of Radiation Toxicology and Oncology, Beijing Key Laboratory for Radiobiology, Beijing Institute of Radiation Medicine, Beijing, 100850, P. R. China. <sup>2</sup>Institute for Environmental Medicine and Radiation Hygiene, College of Public Health, University of South China, Hengyang, Hunan Province, 421000, P.R. China. #: These two authors contributed equally to this work. Correspondence and requests for materials should be addressed to P-K Z (email: [zhoupk@bmi.ac.cn](mailto:zhoupk@bmi.ac.cn)) and Z-D W (email: [wangzhidong1977@126.com](mailto:wangzhidong1977@126.com))

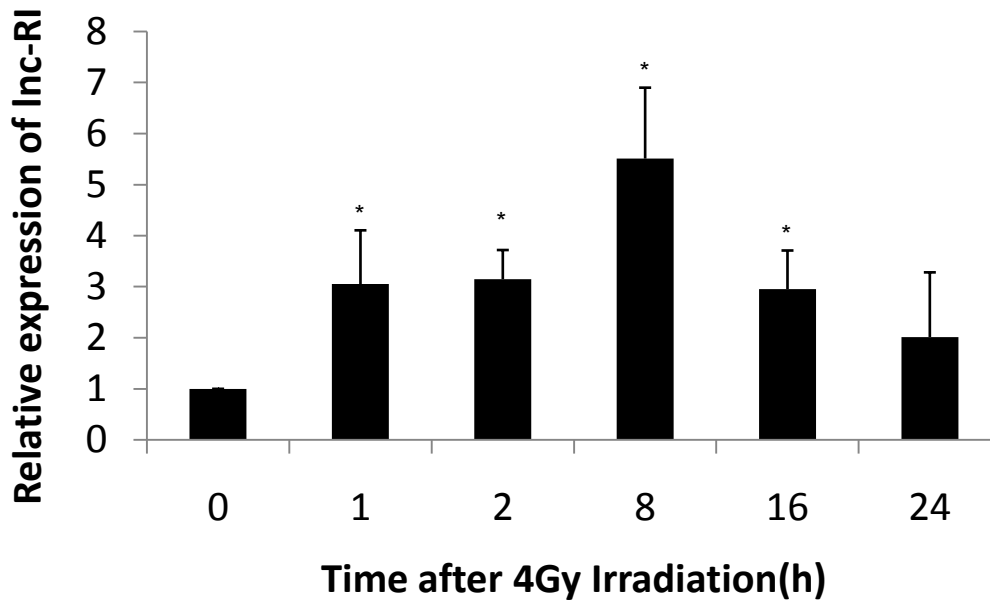

**Supplementary Figure S1. Analysis of Inc-Rl expression in HeLa cells exposed to 4Gy  $\gamma$ -rays.** HeLa cells were exposed to 4Gy  $\gamma$ -rays and cells were collected at different times point after radiation and total RNA was extracted and expression of Inc-Rl were analyzed using Real Time PCR. \*  $p < 0.05$ .

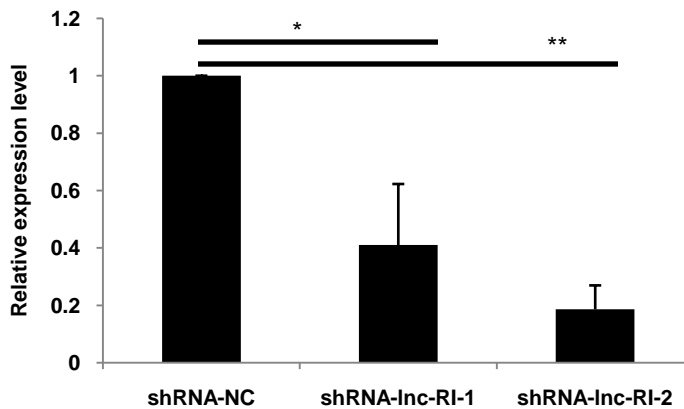

**Supplementary Figure S2. Effect of shRNA-Inc-Rl on expression of Inc-Rl.** HeLa cells were transfected with plasmids expressing shRNA targeting Inc-Rl or control shRNA. 48h after transfection, Inc-Rl expression level were examine using Real Time PCR. \*  $p < 0.05$ ; \*\*  $p < 0.01$

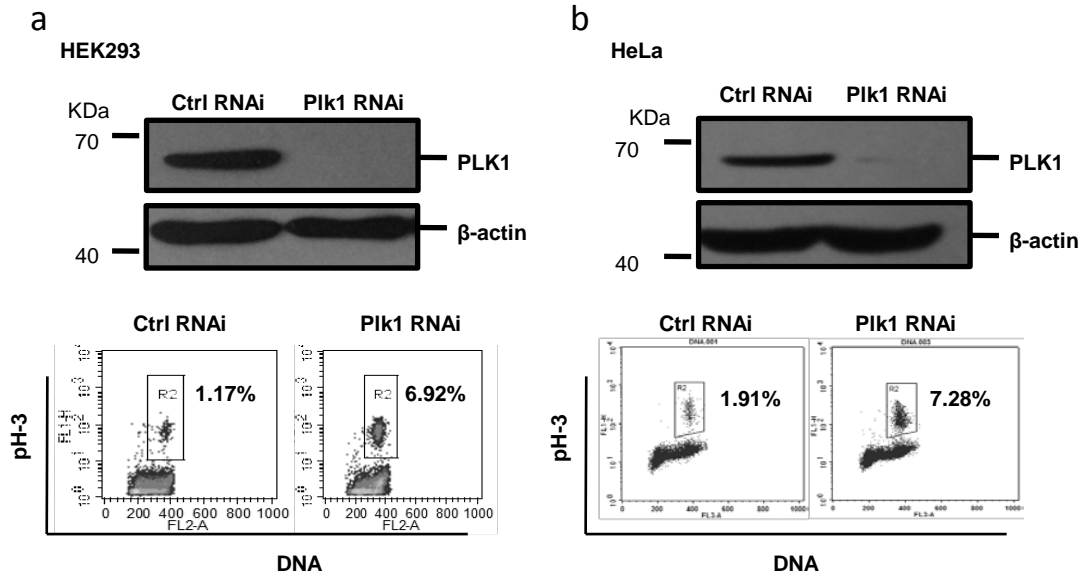

**Supplementary Figure S3. Effect of plk1 knockdown on mitosis arrest in HEK293(a) and HeLa (b) cells.** The HEK293 cells and HeLa cells were transfected with PLK1 RNAi or Ctrl RNAi. 48h after transfection, the cells were harvested and PLK1 expression (up) and mitotic index (down) were analysed.

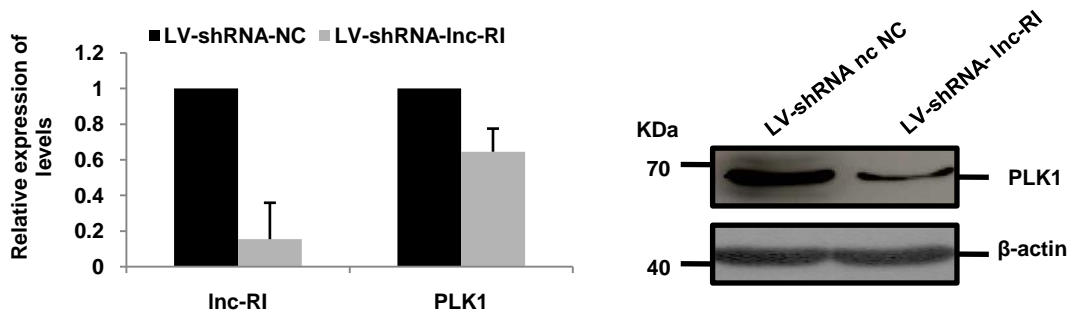

**Supplementary Figure S4. Effect of LV-shRNA-Inc-RI on expression of Inc-RI and PLK1.** HeLa cells were infected with LV-shRNA-Inc-RI or LV-shRNA-NC NA. 3d after infection, expression level Inc-RI and plk1 were examine using Real Time PCR and western blot.

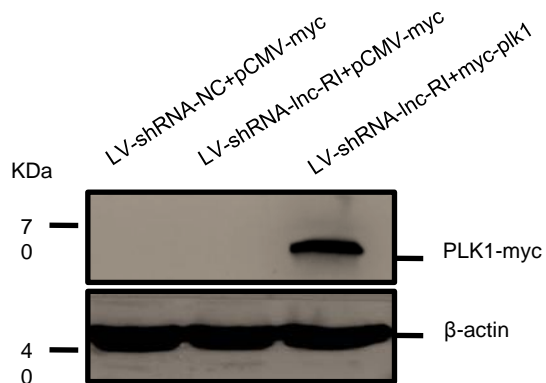

**Supplementary Figure S5. Plk1-myc expression in HeLa infected with LV-shRNA-Inc-RI.** HeLa cells were infencted with LV-shRNA-Inc-RI or LV-shRNA-NC. 3 days after infection ,cells were transfected with plasmid expressing plk1-myc or control plasmid and 48h after transfection, cells were harvested and plk1-myc expression was detected using myc tag antibody.

**Table S1 Sequences of oligonucleotides****siRNA sequence for Inc-RI or negative control**

|               |         |                           |
|---------------|---------|---------------------------|
| Inc-RI RNAi-1 | Forward | 5'GCCCAUGUCACCUAUGUGUTT3' |
|               | Reverse | 5'ACACAUAGGUGACAUGGGCTT3' |
| Inc-RI RNAi-2 | Forward | 5'GCUGAAUCCUCACAGCCUUTT3' |
|               | Reverse | 5'AAGGCUGUGAGGAUUCAGCTT3' |
| Ctrl RNAi     | Forward | 5'UUCUCCGAACGUGUCACGUTT3' |
|               | Reverse | 5'ACGUGACACGUUCGGAGAATT3' |
| plk1 RNAi     | Forward | 5'AGAUUGUGCCUAAGUCUCUTT3' |
|               | Reverse | 5'AGAGACUUAGGCACAAUCUTT3' |

**Sequences of miRNA mimics**

|              |         |                            |
|--------------|---------|----------------------------|
| miRNA-NC     | Forward | 5'UUCUCCGAACGUGUCACGUTT3'  |
|              | Reverse | 5'ACGUGACACGUUCGGAGAATT3'  |
| hsa-miRNA-21 | Forward | 5'CUGUGCGUGUGACAGCGGCUGA3' |
|              | Reverse | 5'AGCCGCUGUCACACGCACAGUU3' |

**Sequences of miRNA inhibitor**

|                            |                            |
|----------------------------|----------------------------|
| miRNA inhibitor NC         | 5'CAGUACUUUUGUGUAGUACAA3'  |
| hsa-miRNA-210-3p inhibitor | 5'UCAGCCGCUGUCACACGCACAG3' |

**Primers used for Real Time-PCR**

|        |           |                                 |
|--------|-----------|---------------------------------|
| actin  | Forward   | 5'CCCTGGCACCCAGCAC3'            |
|        | Reverse   | 5'GCCGATCCACACGGAGTAC3'         |
|        | probe     | 5'ATCAAGATCATTGCTCCTCCTGAGCGC3' |
| Inc-RI | sense     | 5'CACACATCGTATACTCTGTCCCTG3'    |
|        | antisense | 5'ACTGGTGAGCCTGAGTAGGTATG3'     |
|        | Probe     | 5'CACCAGGCAGTCTAAGCCCATGTCA3'   |
| PLK1   | Forward   | 5'GCAGCGTGCAGATCAACTTC3'        |
|        | Reverse   | 5'CCCGCTTCTCGTCGATGTAG3'        |
|        | probe     | 5'TCATCTTGTGCCCACTGATGGCAGC3'   |

**Primers used for RT-PCR**

|                |         |                          |
|----------------|---------|--------------------------|
| $\beta$ -actin | Forward | 5'CCTCTCCCAAGTCCACACAG3' |
|                | Reverse | 5'GGGCACGAAGGCTCATCATT3' |
| Inc-RI         | Forward | 5'ACCTGCTCTGGGGTTGCCAT3' |
|                | Reverse | 5'ACGTAGCCTTGCTGGGTGTG3' |

**Sequences of shRNA target**

|                |                            |
|----------------|----------------------------|
| shRNA-NC       | 5'GTTCTCCGAACGTGTCACGT3'   |
| shRNA-Inc-RI-1 | 5'GCACATACCTACTCAGGCACA3'  |
| ShRNA-Inc-RI-2 | 5'TGAATCCTCACAGCCTTGTTCC3' |

**Table 2S List of genes changed after Inc-RI RNAi**

| Gene Symbol | Gene ID   | Ratio of Inc-RNAi to Ctrl |               |
|-------------|-----------|---------------------------|---------------|
|             |           | Inc-RI RNAi-1             | Inc-RI RNAi-2 |
| PLCB4       | AL535113  | 2.3926                    | 3.3232        |
| ZNF702P     | NM_024924 | 2.295                     | 3.0077        |
| SLC27A6     | NM_014031 | 2.0365                    | 2.9896        |
| LEPR        | U50748    | 1.5217                    | 2.871         |
| ZNF616      | BG170845  | 1.5554                    | 2.8319        |
| DCBLD2      | AA722799  | 2.6239                    | 2.7807        |
| PREPL       | BF445273  | 2.0768                    | 2.7545        |
| DDHD1       | AA029818  | 1.6321                    | 2.5603        |
| UGT2A3      | NM_024743 | 2.83                      | 2.5137        |
| ERBB4       | AW772192  | 1.6757                    | 2.3978        |
| NEGR1       | AI123532  | 1.5147                    | 2.295         |
| ENTPD4      | AB002390  | 1.8359                    | 2.2489        |
| ABCA13      | NM_152701 | 1.5738                    | 2.2427        |
| ELFN2       | BC032083  | 1.8795                    | 2.2182        |
| DZIP1       | NM_014934 | 1.895                     | 2.2011        |
| C7orf55     | BF540829  | 1.5702                    | 2.1669        |
| CHD9        | AW971892  | 1.7769                    | 2.1619        |
| DPYD        | NM_000110 | 1.7498                    | 2.1619        |
| PLDN        | BC004819  | 1.7694                    | 2.1521        |
| CTSB        | AA020826  | 1.5633                    | 2.1443        |
| CYLD        | AI453099  | 1.5322                    | 2.1408        |
| CPA3        | NM_001870 | 1.7506                    | 2.1333        |
| NLGN1       | AI912122  | 2.0819                    | 2.122         |
| PEX13       | BC040953  | 1.9908                    | 2.0933        |
| MESDC2      | AK026606  | 2.0005                    | 2.0873        |
| CHST14      | AA039350  | 1.5835                    | 2.0781        |
| THBS1       | NM_003246 | 1.5281                    | 2.0652        |
| HS2ST1      | AW151887  | 1.6945                    | 2.064         |
| FGF7        | AF523265  | 1.5977                    | 2.0424        |
| MNX1        | AI738662  | 1.7579                    | 2.0136        |
| TBC1D9      | AI348094  | 1.8478                    | 2.0065        |
| PLEKHB2     | NM_017958 | 1.5175                    | 1.9389        |
| ZNF253      | AV683221  | 1.6316                    | 1.9324        |
| LOC253264   | AK023445  | 1.9305                    | 1.9121        |
| GFPT1       | AI268315  | 1.5147                    | 1.8984        |
| FGFR3       | NM_000142 | 1.5121                    | 1.8829        |
| GANAB       | W87689    | 1.7003                    | 1.8813        |
| ZNF45       | NM_003425 | 1.9453                    | 1.8599        |
| ARHGEF9     | NM_015185 | 1.6156                    | 1.8597        |
| GK5         | AI866260  | 1.5399                    | 1.8562        |
| PLA2G12A    | NM_030821 | 1.5864                    | 1.8557        |
| SNX16       | AW150236  | 2.606                     | 1.8502        |
| HABP4       | AF241831  | 1.5861                    | 1.8486        |
| MTHFD2L     | AA702016  | 1.9015                    | 1.809         |
| PREX1       | BF308645  | 1.7175                    | 1.8035        |

| Gene Symbol | Gene ID   | Ratio of Inc-RNAi to Ctrl |               |
|-------------|-----------|---------------------------|---------------|
|             |           | Inc-RI RNAi-1             | Inc-RI RNAi-2 |
| PTGER4      | AA897516  | 1.6327                    | 1.8033        |
| PTGR2       | BE465894  | 2.0819                    | 1.7925        |
| HSDL2       | BC004331  | 1.5594                    | 1.7919        |
| STX12       | AI816243  | 1.6652                    | 1.7866        |
| MAP4K4      | NM_017792 | 1.5179                    | 1.7808        |
| KLHDC7B     | AI631846  | 1.5374                    | 1.778         |
| ERG         | AA296657  | 1.512                     | 1.7746        |
| CCDC88C     | AB040942  | 1.5976                    | 1.7657        |
| PDSS2       | NM_020381 | 1.7175                    | 1.7593        |
| CASP7       | NM_001227 | 1.5214                    | 1.7543        |
| MIB1        | BE048628  | 1.8546                    | 1.7532        |
| DNM3        | AI631915  | 1.5253                    | 1.751         |
| G3BP2       | AB014560  | 1.9389                    | 1.7453        |
| C2CD2       | AP001745  | 2.0207                    | 1.7406        |
| STXBP5      | AI825998  | 1.5373                    | 1.7307        |
| ITPR2       | AA834576  | 1.5351                    | 1.7181        |
| FOXP2       | AW291402  | 1.7798                    | 1.7177        |
| NTN4        | AF278532  | 1.5724                    | 1.7158        |
| CD164       | BF669455  | 2.0885                    | 1.713         |
| BCL2        | NM_000657 | 1.7844                    | 1.7043        |
| TGFB2       | M19154    | 1.6333                    | 1.6988        |
| CREBL2      | AL529409  | 1.5973                    | 1.6981        |
| PDE4DIP     | H15535    | 1.7811                    | 1.696         |
| KDM2A       | BE675843  | 1.5576                    | 1.6859        |
| UBE2D1      | AL545760  | 1.5717                    | 1.685         |
| MGC16385    | NM_145039 | 1.557                     | 1.6848        |
| FAM13C      | BC036453  | 1.8021                    | 1.6713        |
| FBXO45      | AA973128  | 1.5357                    | 1.6692        |
| BDH2        | AW136198  | 1.5214                    | 1.6652        |
| ZNF234      | BE909177  | 1.6242                    | 1.6573        |
| DNAJC6      | AV729634  | 1.5857                    | 1.6568        |
| LYPD6       | AA227842  | 1.5659                    | 1.6557        |
| RP9P        | AK091223  | 1.831                     | 1.653         |
| C16orf63    | AA524072  | 1.6505                    | 1.6519        |
| TCF4        | BF592782  | 1.8309                    | 1.6499        |
| SLC33A1     | NM_004733 | 1.6151                    | 1.6473        |
| C9orf86     | BE783949  | 1.8049                    | 1.644         |
| SPRED1      | BE967019  | 1.5009                    | 1.6413        |
| COX11       | AI376724  | 1.6334                    | 1.6406        |
| FARSB       | AW024617  | 1.836                     | 1.6361        |
| ZSCAN29     | BE622486  | 1.5754                    | 1.6352        |
| THAP5       | AI878997  | 1.7907                    | 1.6336        |
| ALDH1L2     | AI654224  | 1.6492                    | 1.6266        |
| ITGB8       | BF513121  | 1.7746                    | 1.625         |
| USPL1       | AL832776  | 1.5188                    | 1.6224        |
| PPM1A       | AI241945  | 1.9581                    | 1.6218        |

| Gene Symbol   | Gene ID   | Ratio of Inc-RNAi to Ctrl |               |
|---------------|-----------|---------------------------|---------------|
|               |           | Inc-RI RNAi-1             | Inc-RI RNAi-2 |
| HISPPD1       | NM_015216 | 1.556                     | 1.6139        |
| MAMDC2        | AI862120  | 1.6479                    | 1.6124        |
| ATF1          | CA337502  | 1.6167                    | 1.6116        |
| EPB41L3       | AI770004  | 1.5316                    | 1.6037        |
| KLHDC10       | D87454    | 1.7923                    | 1.6007        |
| ZNF664        | BE965646  | 1.5616                    | 1.5931        |
| CCDC85A       | AI376433  | 1.5337                    | 1.5734        |
| ANKRD12       | AW572909  | 1.7447                    | 1.5727        |
| FAM173B       | AI384017  | 1.5794                    | 1.5687        |
| LPP           | BF221852  | 1.6944                    | 1.5631        |
| ZNF805        | AV726376  | 1.7775                    | 1.5527        |
| PCDH7         | BE644809  | 1.7188                    | 1.5522        |
| ZNF140        | NM_003440 | 1.5526                    | 1.5495        |
| TMTC2         | AI862551  | 1.6854                    | 1.5481        |
| TRAF3         | AI721219  | 1.593                     | 1.5472        |
| DBT           | M27093    | 1.6393                    | 1.546         |
| ZNF184        | AI811577  | 1.5365                    | 1.5365        |
| FKBP7         | AA683602  | 1.9764                    | 1.5354        |
| LOC339929     | BC042414  | 1.6258                    | 1.5317        |
| DCN           | AI336924  | 1.5271                    | 1.5287        |
| TPM4          | BC002827  | 2.1417                    | 1.5244        |
| SDCCAG8       | NM_006642 | 1.7163                    | 1.5198        |
| RGS19         | NM_005873 | 1.7565                    | 1.5167        |
| SLMAP         | BF526855  | 1.7083                    | 1.5166        |
| TTC3          | BC026260  | 1.6782                    | 1.5083        |
| TMEM64        | AA524005  | 0.5884                    | 0.669         |
| DHX9          | BF313832  | 0.5595                    | 0.6663        |
| CABP4         | BC033167  | 0.6478                    | 0.6607        |
| CXCL16        | AF275260  | 0.5663                    | 0.6518        |
| ALDH3A2       | BC002430  | 0.5319                    | 0.6454        |
| PRO2949       | NM_018544 | 0.4912                    | 0.6436        |
| C14orf182     | BF691523  | 0.6122                    | 0.6373        |
| DPEP1         | NM_004413 | 0.5617                    | 0.6335        |
| PDLIM5        | NM_006457 | 0.6511                    | 0.6244        |
| DKFZp686O1327 | U80770    | 0.5434                    | 0.6196        |
| VMA21         | BG036203  | 0.6202                    | 0.6092        |
| KRT17         | NM_000422 | 0.6629                    | 0.6055        |
| ANKFY1        | AK025960  | 0.6089                    | 0.6027        |
| PLK1          | NM_005030 | 0.659                     | 0.598         |
| SSBP1         | BC008402  | 0.6604                    | 0.5876        |
| SF3B1         | AW003030  | 0.6645                    | 0.586         |
| FABP3         | NM_004102 | 0.647                     | 0.5802        |
| MAP3K1        | AA361361  | 0.6501                    | 0.5738        |
| FAM175A       | AK021582  | 0.4781                    | 0.5737        |
| C3orf43       | AL833443  | 0.6259                    | 0.5723        |

| Gene Symbol | Gene ID   | Ratio of Inc-RNAi to Ctrl |               |
|-------------|-----------|---------------------------|---------------|
|             |           | Inc-RI RNAi-1             | Inc-RI RNAi-2 |
| LIG4        | AI829314  | 0.5649                    | 0.5387        |
| TSPAN6      | AF053453  | 0.646                     | 0.5193        |
| C1orf125    | NM_144696 | 0.6089                    | 0.5158        |
| LTB         | BC018898  | 0.5686                    | 0.5129        |
| GPR125      | BC026009  | 0.6088                    | 0.4713        |
| LOC221710   | AI870473  | 0.6511                    | 0.4548        |
| CPEB4       | AV704132  | 0.559                     | 0.4543        |
| FAM111B     | AA960844  | 0.6064                    | 0.4329        |
| ZFR         | BF445199  | 0.644                     | 0.4154        |
| TM4SF1      | AI760128  | 0.5781                    | 0.4105        |
| TANC2       | NM_015623 | 0.4068                    | 0.3502        |
| CEACAM7     | NM_006890 | 0.5827                    | 0.3016        |
| COL10A1     | X98568    | 0.5416                    | 0.3012        |
